# Supplementary material for: Analysis of an intense O 3 pollution episode on the Atlantic coast of the Iberian Peninsula using photochemical modeling: characterization of transport pathways and accumulation processes
Source: Copernicus journal article supplement (doi:10.5194/acp-24-4305-2024), 2024-04-15
Supplement: Supplementary file 1 [file acp-24-4305-2024-supplement.pdf]

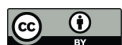

*Supplement of*

**Analysis of an intense O<sub>3</sub> pollution episode on the Atlantic coast of the Iberian Peninsula using photochemical modeling: characterization of transport pathways and accumulation processes**

**Eduardo Torre-Pascual et al.**

*Correspondence to:* Eduardo Torre-Pascual ([eduardo.delatorre@ehu.eus](mailto:eduardo.delatorre@ehu.eus))

The copyright of individual parts of the supplement might differ from the article licence.

**Table S1. Vertical levels for the WRF simulation.**

| Level | $\eta$ | Approximate height of the midpoint of the layer AGL (m) | Level | $\eta$ | Approximate height of the midpoint of the layer AGL (m) |
|-------|--------|---------------------------------------------------------|-------|--------|---------------------------------------------------------|
| 0     | 1.0000 | 0                                                       | 16    | 0.7100 | 2,341                                                   |
| 1     | 0.9975 | 10                                                      | 17    | 0.6100 | 3,130                                                   |
| 2     | 0.9950 | 30                                                      | 18    | 0.5100 | 4,272                                                   |
| 3     | 0.9925 | 50                                                      | 19    | 0.4100 | 5,563                                                   |
| 4     | 0.9900 | 70                                                      | 20    | 0.3600 | 6,635                                                   |
| 5     | 0.9875 | 90                                                      | 21    | 0.2950 | 7,568                                                   |
| 6     | 0.9850 | 110                                                     | 22    | 0.2550 | 8,490                                                   |
| 7     | 0.9800 | 140                                                     | 23    | 0.2200 | 9,215                                                   |
| 8     | 0.9700 | 200                                                     | 24    | 0.1900 | 9,894                                                   |
| 9     | 0.9550 | 301                                                     | 25    | 0.1650 | 10,511                                                  |
| 10    | 0.9350 | 444                                                     | 26    | 0.1450 | 11,052                                                  |
| 11    | 0.9100 | 631                                                     | 27    | 0.1250 | 11,566                                                  |
| 12    | 0.8800 | 864                                                     | 28    | 0.1050 | 12,118                                                  |
| 13    | 0.8450 | 1,145                                                   | 29    | 0.0800 | 12,800                                                  |
| 14    | 0.8100 | 1,458                                                   | 30    | 0.0500 | 13,740                                                  |
| 15    | 0.7600 | 1,854                                                   | 31    | 0.0000 | 15,467                                                  |

**Table S2. Summary of WRF parameterizations.**

| Parameter           | Option                                                         |
|---------------------|----------------------------------------------------------------|
| Shortwave Radiation | MM5 Shortwave radiation scheme<br>(Dudhia, 1989)               |
| Longwave Radiation  | Rapid Radiative Transfer Model (RRTM)<br>(Mlawer et al., 1997) |
| Surface Model       | Noah LSM<br>(Alapaty et al., 2008)                             |
| Microphysics        | WSM6<br>(Hong & Lim, 2006)                                     |
| PBL                 | Yonsei University (YSU)<br>(Hong, Noh & Dudhia, 2006)          |
| SST                 | OISST (Reynolds et al., 2007)                                  |

**Table S3. CAMx and WRF correspondence levels.**

| CAMx level | WRF level | Approximate height of the layer interface AGL (m) |
|------------|-----------|---------------------------------------------------|
| 1          | 1         | 20                                                |
| 2          | 2         | 40                                                |
| 3          | 3         | 60                                                |
| 4          | 4         | 80                                                |
| 5          | 7         | 160                                               |
| 6          | 8         | 220                                               |
| 7          | 9         | 350                                               |
| 8          | 10        | 530                                               |
| 9          | 11        | 730                                               |
| 10         | 12        | 1,000                                             |
| 11         | 14        | 1,600                                             |
| 12         | 16        | 2,500                                             |
| 13         | 17        | 3,600                                             |
| 14         | 18        | 4,800                                             |

**Table S4. Statistical metrics for the selected O<sub>3</sub> measurement stations with its codification and location coordinates in Northern Atlantic Iberia (NAI). The station of Valderejo in the Valderejo Natural Park (VNP) is highlighted in gray.**

| Station Code   | Latitude (degrees) | Longitude (degrees) | MB ( $\mu\text{g}\cdot\text{m}^{-3}$ ) | ME ( $\mu\text{g}\cdot\text{m}^{-3}$ ) | NMB  | IOA  | r    |
|----------------|--------------------|---------------------|----------------------------------------|----------------------------------------|------|------|------|
| ES0005R        | 42.72              | -8.92               | 3                                      | 15                                     | 4%   | 0.82 | 0.73 |
| ES0008R        | 43.44              | -4.85               | 8                                      | 12                                     | 10%  | 0.78 | 0.70 |
| ES0016R        | 42.63              | -7.70               | 26                                     | 27                                     | 46%  | 0.58 | 0.50 |
| ES0094A        | 43.41              | -7.99               | 5                                      | 14                                     | 6%   | 0.81 | 0.68 |
| ES0201A        | 43.45              | -7.85               | 13                                     | 24                                     | 25%  | 0.72 | 0.63 |
| ES0339A        | 43.69              | -7.51               | 32                                     | 32                                     | 66%  | 0.44 | 0.60 |
| ES0354A        | 42.88              | -6.44               | 41                                     | 41                                     | 80%  | 0.45 | 0.50 |
| ES0360A        | 42.78              | -6.60               | 16                                     | 20                                     | 21%  | 0.66 | 0.57 |
| ES0365A        | 42.70              | -4.83               | 10                                     | 27                                     | 12%  | 0.54 | 0.51 |
| ES0373A        | 42.63              | -6.52               | 14                                     | 20                                     | 20%  | 0.71 | 0.59 |
| ES0377A        | 42.61              | -6.64               | 12                                     | 21                                     | 17%  | 0.76 | 0.69 |
| ES0587A        | 43.32              | -3.11               | 4                                      | 17                                     | 7%   | 0.87 | 0.77 |
| ES0761A        | 42.72              | -5.64               | 27                                     | 28                                     | 44%  | 0.61 | 0.64 |
| ES0824A        | 43.31              | -5.71               | 24                                     | 31                                     | 47%  | 0.67 | 0.57 |
| ES0825A        | 43.31              | -5.69               | 27                                     | 33                                     | 55%  | 0.64 | 0.53 |
| ES0879A        | 43.55              | -5.90               | -3                                     | 18                                     | -5%  | 0.77 | 0.61 |
| ES0880A        | 43.55              | -5.92               | -4                                     | 22                                     | -7%  | 0.65 | 0.44 |
| ES0901A        | 43.24              | -8.32               | 20                                     | 26                                     | 36%  | 0.74 | 0.71 |
| ES0961A        | 42.43              | -8.68               | 6                                      | 27                                     | 7%   | 0.70 | 0.65 |
| ES1038A        | 43.35              | -4.06               | 33                                     | 34                                     | 67%  | 0.65 | 0.65 |
| ES1137A        | 42.22              | -8.74               | 26                                     | 33                                     | 44%  | 0.66 | 0.60 |
| ES1138A        | 43.37              | -8.42               | 26                                     | 31                                     | 63%  | 0.55 | 0.47 |
| ES1175A        | 42.72              | -7.45               | 35                                     | 38                                     | 69%  | 0.51 | 0.30 |
| ES1268A        | 43.36              | -5.87               | -12                                    | 24                                     | -19% | 0.78 | 0.67 |
| ES1269A        | 43.37              | -5.83               | 3                                      | 23                                     | 6%   | 0.78 | 0.66 |
| ES1270A        | 43.54              | -5.66               | -3                                     | 23                                     | -7%  | 0.61 | 0.42 |
| ES1271A        | 43.54              | -5.70               | -21                                    | 25                                     | -30% | 0.61 | 0.54 |
| ES1285A        | 43.53              | -7.74               | 14                                     | 21                                     | 21%  | 0.54 | 0.34 |
| ES1287A        | 42.80              | -4.84               | 18                                     | 23                                     | 27%  | 0.60 | 0.61 |
| ES1297A        | 42.80              | -5.62               | 6                                      | 19                                     | 7%   | 0.69 | 0.59 |
| ES1346A        | 42.69              | -2.94               | 12                                     | 22                                     | 16%  | 0.74 | 0.72 |
| ES1349A        | 43.14              | -2.96               | 45                                     | 46                                     | 92%  | 0.61 | 0.66 |
| ES1353A        | 43.29              | -5.68               | 17                                     | 27                                     | 30%  | 0.70 | 0.57 |
| ES1358A        | 43.54              | -5.65               | -1                                     | 16                                     | -2%  | 0.70 | 0.50 |
| ES1359A        | 43.31              | -7.69               | 30                                     | 30                                     | 57%  | 0.60 | 0.53 |
| ES1424A        | 43.56              | -5.93               | 8                                      | 21                                     | 20%  | 0.66 | 0.54 |
| ES1432A        | 43.18              | -6.55               | 41                                     | 42                                     | 81%  | 0.54 | 0.61 |
| ES1439A        | 42.20              | -8.75               | 25                                     | 34                                     | 38%  | 0.66 | 0.59 |
| ES1472A        | 42.81              | -1.65               | 11                                     | 16                                     | 14%  | 0.81 | 0.79 |
| <b>ES1489A</b> | <b>42.88</b>       | <b>-3.23</b>        | 4                                      | 19                                     | 4%   | 0.80 | 0.73 |

| Station Code | Latitude (degrees) | Longitude (degrees) | MB ( $\mu\text{g}\cdot\text{m}^{-3}$ ) | ME ( $\mu\text{g}\cdot\text{m}^{-3}$ ) | NMB  | IOA  | r    |
|--------------|--------------------|---------------------|----------------------------------------|----------------------------------------|------|------|------|
| ES1490A      | 43.17              | -2.64               | 45                                     | 45                                     | 103% | 0.59 | 0.73 |
| ES1491A      | 43.41              | -2.70               | 10                                     | 16                                     | 14%  | 0.78 | 0.79 |
| ES1501A      | 43.18              | -2.27               | 38                                     | 40                                     | 66%  | 0.55 | 0.41 |
| ES1529A      | 43.47              | -3.79               | 13                                     | 15                                     | 20%  | 0.77 | 0.74 |
| ES1530A      | 43.01              | -4.14               | 24                                     | 25                                     | 35%  | 0.68 | 0.66 |
| ES1531A      | 43.15              | -4.25               | 21                                     | 24                                     | 29%  | 0.68 | 0.65 |
| ES1544A      | 42.85              | -2.39               | 16                                     | 28                                     | 21%  | 0.66 | 0.63 |
| ES1557A      | 43.26              | -8.56               | 28                                     | 31                                     | 48%  | 0.55 | 0.47 |
| ES1576A      | 43.40              | -3.84               | 37                                     | 37                                     | 84%  | 0.59 | 0.68 |
| ES1577A      | 43.42              | -3.84               | 27                                     | 28                                     | 50%  | 0.66 | 0.67 |
| ES1578A      | 43.38              | -3.22               | 20                                     | 22                                     | 35%  | 0.74 | 0.72 |
| ES1579A      | 43.26              | -4.06               | 50                                     | 50                                     | 120% | 0.55 | 0.60 |
| ES1591A      | 42.56              | -6.73               | 26                                     | 34                                     | 42%  | 0.59 | 0.54 |
| ES1598A      | 43.21              | -3.13               | 24                                     | 30                                     | 34%  | 0.68 | 0.56 |
| ES1599A      | 43.25              | -2.16               | 0                                      | 13                                     | -1%  | 0.86 | 0.78 |
| ES1651A      | 43.26              | -5.78               | 19                                     | 27                                     | 36%  | 0.73 | 0.62 |
| ES1696A      | 43.30              | -1.98               | 24                                     | 26                                     | 40%  | 0.64 | 0.66 |
| ES1697A      | 43.31              | -2.01               | 24                                     | 27                                     | 41%  | 0.62 | 0.62 |
| ES1713A      | 43.25              | -2.90               | 37                                     | 37                                     | 89%  | 0.65 | 0.75 |
| ES1740A      | 42.81              | -1.64               | 29                                     | 30                                     | 53%  | 0.63 | 0.70 |
| ES1747A      | 42.83              | -1.65               | 10                                     | 15                                     | 14%  | 0.83 | 0.80 |
| ES1749A      | 42.90              | -2.17               | 27                                     | 32                                     | 40%  | 0.59 | 0.46 |
| ES1790A      | 42.54              | -6.58               | 25                                     | 30                                     | 40%  | 0.63 | 0.62 |
| ES1867A      | 43.48              | -8.24               | 31                                     | 31                                     | 56%  | 0.48 | 0.37 |
| ES1868A      | 42.88              | -8.56               | 14                                     | 22                                     | 21%  | 0.75 | 0.67 |
| ES1901A      | 42.89              | -8.53               | 19                                     | 27                                     | 28%  | 0.67 | 0.59 |
| ES1905A      | 43.00              | -7.55               | 40                                     | 40                                     | 103% | 0.45 | 0.42 |
| ES1907A      | 43.30              | -8.51               | 25                                     | 26                                     | 61%  | 0.74 | 0.79 |
| ES1957A      | 43.38              | -8.41               | 25                                     | 26                                     | 47%  | 0.61 | 0.68 |
| ES1960A      | 43.49              | -8.25               | 18                                     | 21                                     | 27%  | 0.56 | 0.38 |
| ES1974A      | 43.52              | -5.67               | -6                                     | 18                                     | -11% | 0.81 | 0.70 |
| ES1987A      | 42.95              | -3.48               | 14                                     | 20                                     | 18%  | 0.73 | 0.61 |
| ES1988A      | 42.58              | -5.57               | 10                                     | 20                                     | 15%  | 0.78 | 0.81 |
| ES1989A      | 43.04              | -5.09               | 33                                     | 34                                     | 63%  | 0.46 | 0.17 |
| ES2014A      | 42.06              | -7.41               | 16                                     | 18                                     | 21%  | 0.63 | 0.58 |
| ES2015A      | 42.18              | -8.52               | 44                                     | 46                                     | 93%  | 0.59 | 0.61 |
| ES2049A      | 43.12              | -8.35               | 11                                     | 22                                     | 15%  | 0.76 | 0.62 |
| ES2051A      | 43.40              | -5.80               | 6                                      | 24                                     | 13%  | 0.75 | 0.65 |
| ES2054A      | 43.57              | -5.96               | 21                                     | 24                                     | 51%  | 0.72 | 0.69 |
| ES2058A      | 43.26              | -2.97               | 35                                     | 35                                     | 72%  | 0.66 | 0.73 |
| ES2075A      | 43.35              | -5.97               | 25                                     | 27                                     | 55%  | 0.76 | 0.75 |
| ES2083A      | 43.07              | -6.19               | 24                                     | 28                                     | 34%  | 0.58 | 0.52 |
| ES2085A      | 42.06              | -7.73               | 29                                     | 32                                     | 51%  | 0.57 | 0.38 |

**Table S5. Statistical metrics for the selected O<sub>3</sub> measurement stations with its codification and location coordinates in Western Atlantic Iberia (WAI). The station of Douro Norte (DN) in Alvão Natural Park is highlighted in gray.**

| Station Code   | Latitude (degrees) | Longitude (degrees) | MB ( $\mu\text{g}\cdot\text{m}^{-3}$ ) | ME ( $\mu\text{g}\cdot\text{m}^{-3}$ ) | NMB  | IOA  | r    |
|----------------|--------------------|---------------------|----------------------------------------|----------------------------------------|------|------|------|
| PT01034        | 41.22              | -8.63               | -1                                     | 22                                     | -1%  | 0.85 | 0.81 |
| PT01044        | 41.27              | -8.38               | 68                                     | 68                                     | 293% | 0.41 | 0.54 |
| PT01047        | 41.80              | -8.70               | 40                                     | 41                                     | 78%  | 0.36 | 0.17 |
| <b>PT01048</b> | <b>41.37</b>       | <b>-7.79</b>        | 1                                      | 10                                     | 1%   | 0.88 | 0.82 |
| PT01050        | 41.15              | -8.66               | 8                                      | 21                                     | 13%  | 0.84 | 0.74 |
| PT02004        | 40.76              | -8.57               | 21                                     | 33                                     | 35%  | 0.75 | 0.81 |
| PT02016        | 40.21              | -8.41               | 7                                      | 20                                     | 9%   | 0.82 | 0.85 |
| PT02018        | 40.59              | -8.67               | 18                                     | 31                                     | 26%  | 0.73 | 0.77 |
| PT02020        | 40.23              | -7.30               | 23                                     | 26                                     | 36%  | 0.53 | 0.32 |
| PT02022        | 40.18              | -8.68               | -11                                    | 21                                     | -11% | 0.77 | 0.81 |
| PT03063        | 38.62              | -9.08               | 14                                     | 23                                     | 22%  | 0.78 | 0.74 |
| PT03070        | 38.73              | -9.11               | 1                                      | 17                                     | 1%   | 0.85 | 0.78 |
| PT03071        | 38.77              | -9.11               | 11                                     | 19                                     | 16%  | 0.77 | 0.70 |
| PT03072        | 38.75              | -9.15               | 9                                      | 20                                     | 14%  | 0.80 | 0.73 |
| PT03082        | 38.74              | -9.21               | 9                                      | 22                                     | 13%  | 0.81 | 0.77 |
| PT03083        | 38.66              | -9.16               | 11                                     | 24                                     | 16%  | 0.78 | 0.76 |
| PT03084        | 38.75              | -9.23               | -11                                    | 16                                     | -12% | 0.82 | 0.80 |
| PT03085        | 38.83              | -9.17               | -7                                     | 15                                     | -8%  | 0.84 | 0.79 |
| PT03087        | 38.71              | -9.21               | 3                                      | 19                                     | 4%   | 0.81 | 0.74 |
| PT03089        | 38.78              | -9.35               | -13                                    | 17                                     | -14% | 0.79 | 0.71 |
| PT03091        | 38.70              | -9.32               | -5                                     | 15                                     | -5%  | 0.84 | 0.73 |
| PT03093        | 38.53              | -8.89               | -13                                    | 19                                     | -14% | 0.80 | 0.78 |
| PT03095        | 38.66              | -9.07               | -4                                     | 20                                     | -5%  | 0.80 | 0.76 |
| PT03096        | 39.35              | -8.47               | -27                                    | 27                                     | -25% | 0.67 | 0.76 |
| PT03099        | 38.64              | -8.69               | -3                                     | 15                                     | -4%  | 0.79 | 0.74 |
| PT03101        | 38.90              | -9.04               | -1                                     | 17                                     | -1%  | 0.77 | 0.70 |
| PT03102        | 39.28              | -9.25               | -14                                    | 19                                     | -15% | 0.72 | 0.73 |
| PT04001        | 37.95              | -8.84               | -75                                    | 75                                     | -70% | 0.40 | 0.39 |
| PT04002        | 38.08              | -8.80               | -69                                    | 76                                     | -46% | 0.53 | 0.64 |
| PT04006        | 38.62              | -7.40               | 23                                     | 26                                     | 39%  | 0.54 | 0.46 |
| PT05007        | 37.01              | -7.93               | -7                                     | 13                                     | -7%  | 0.80 | 0.75 |
| PT05008        | 37.09              | -8.25               | -4                                     | 12                                     | -5%  | 0.84 | 0.73 |
| PT05012        | 37.31              | -7.68               | -16                                    | 16                                     | -16% | 0.76 | 0.82 |

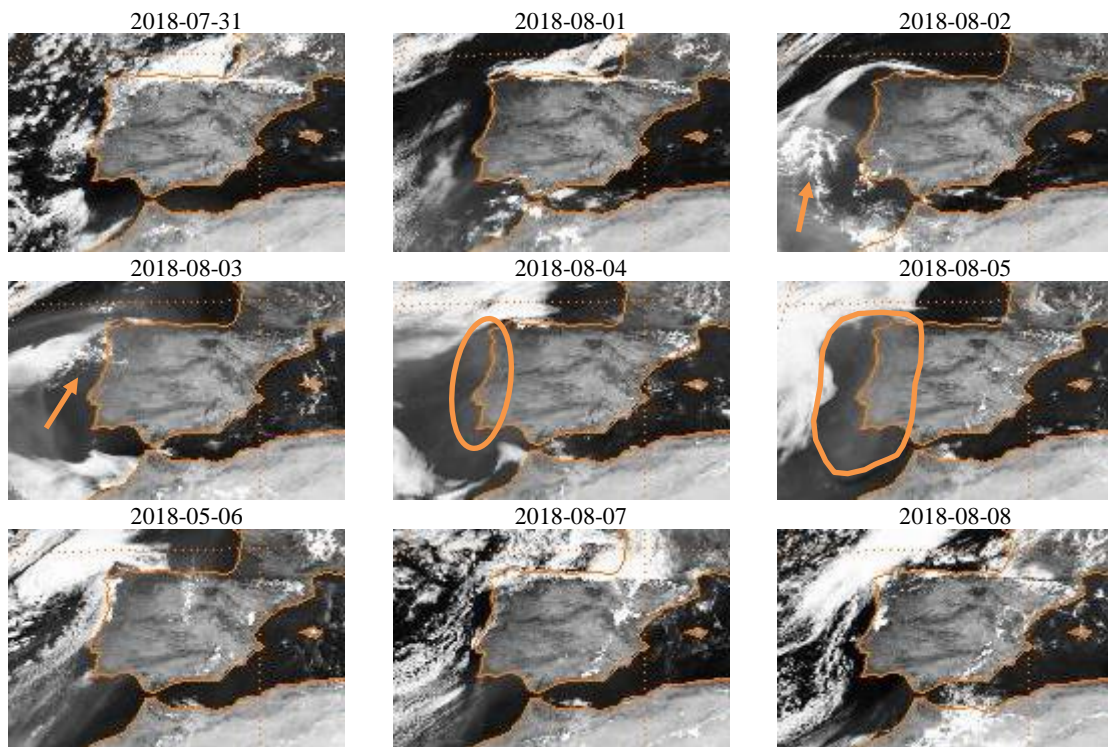

**Figure S1.** Satellite imagery from the Meteosat visible channel by NOAA's Global ISCCP B1 Browse System at daily 12 UTC from July 31 to August 8 (Knapp, 2008). Orange marks indicate the possible location of the Saharan dust transported to the Iberian Peninsula.



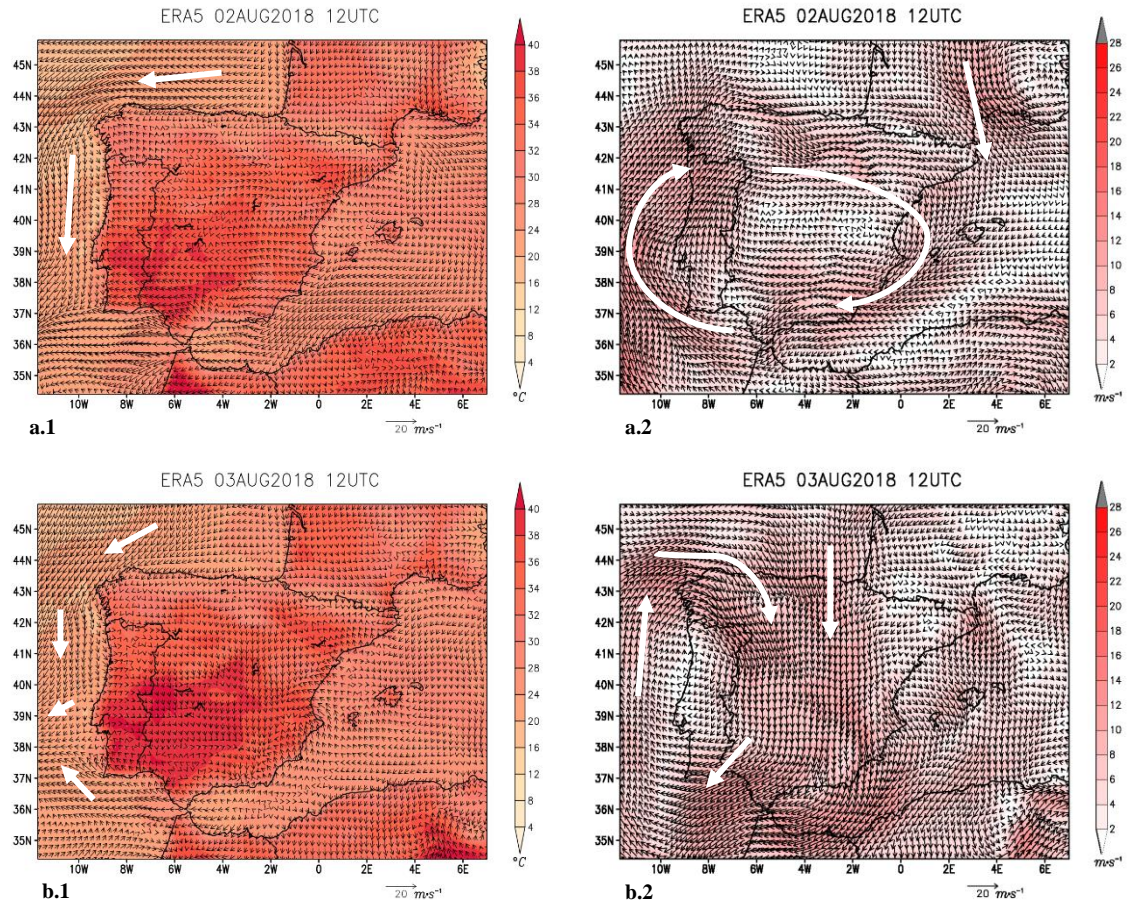

**Figure S2.** ERA5 reanalysis for August 2 and August 3. Left panels: Surface wind field vectors and surface air temperature (color scale). Right panels: wind field vectors at 750 hPa and wind speed at 750 hPa (color scale).

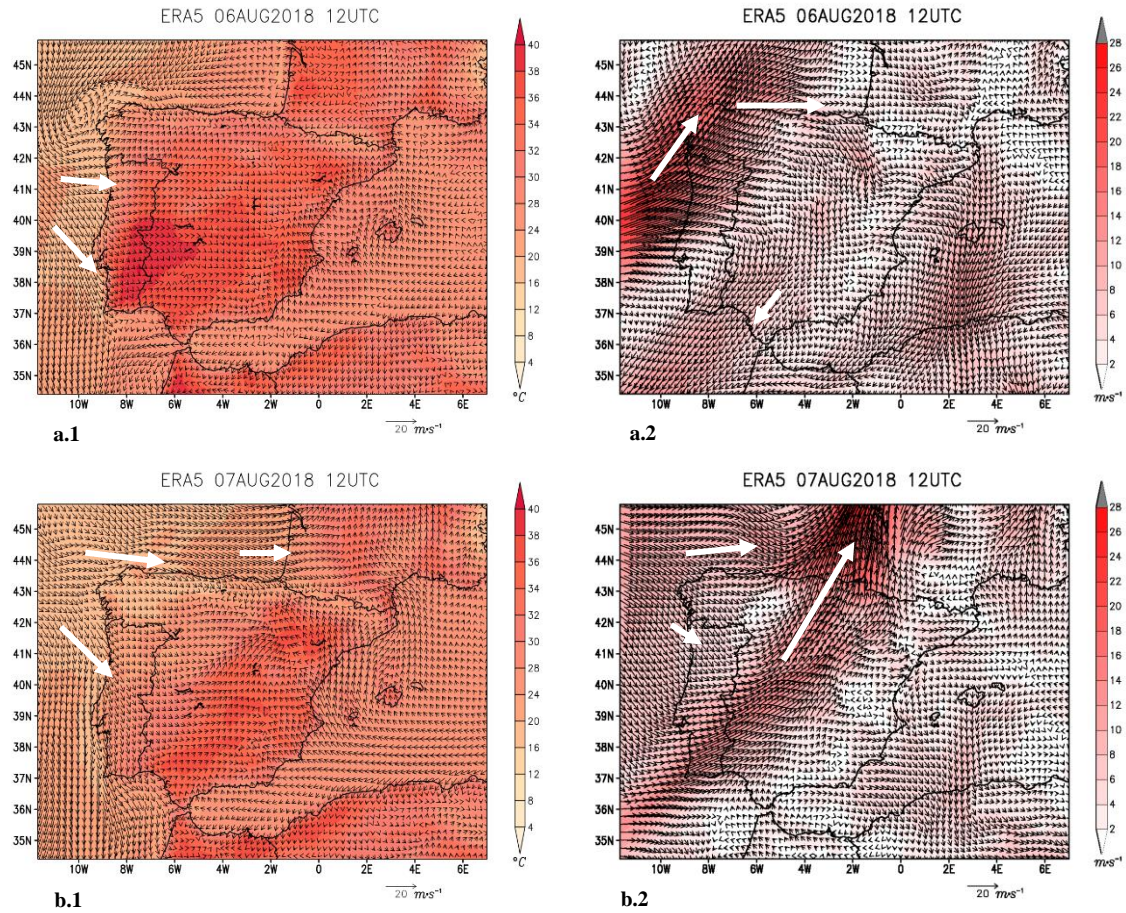

**Figure S3. ERA5 reanalysis for August 6 and August 7. Left panels: Surface wind field vectors and surface air temperature (color scale). Right panels: wind field vectors at 750 hPa and wind speed at 750 hPa (color scale).**

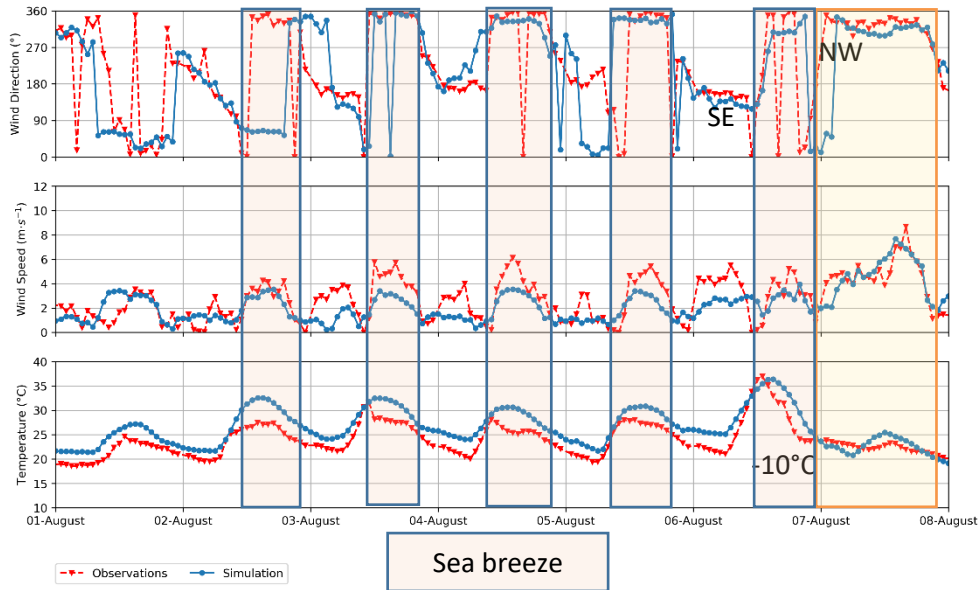

**Figure S4.** Comparison of observed (red) and simulated (blue) wind direction, wind speed, and temperature time series for the Deusto station (August 1-7, 2018). The phases of sea breezes are marked in blue squares and the passage of the front with its consequent reduction of temperatures and wind shift to northwest in orange.

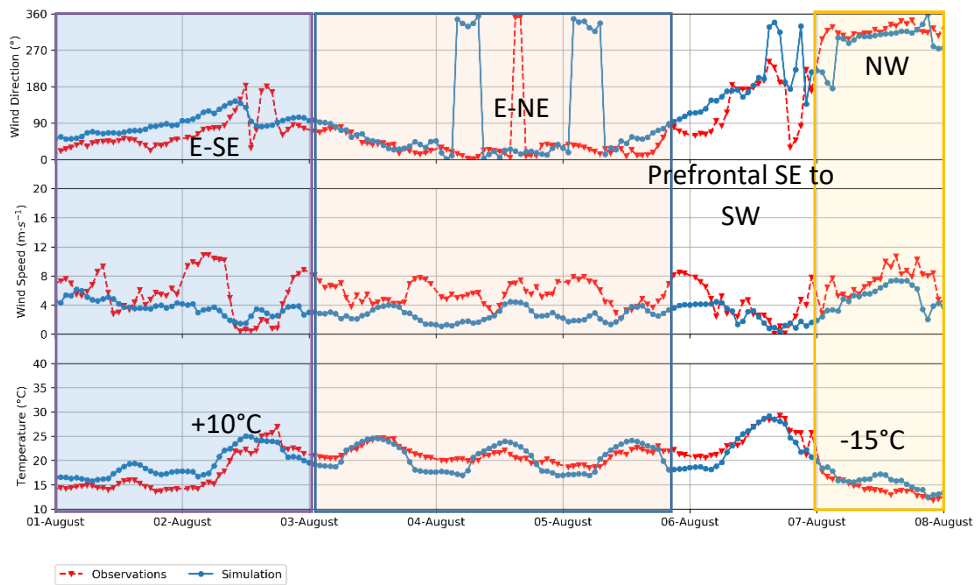

**Figure S5.** Comparison of observed (red) and simulated (blue) wind direction, wind speed, and temperature time series for the Oiz station (998 m ASL) (August 1-7, 2018). The three meteorological changes observed during the episode are distinguished by color.

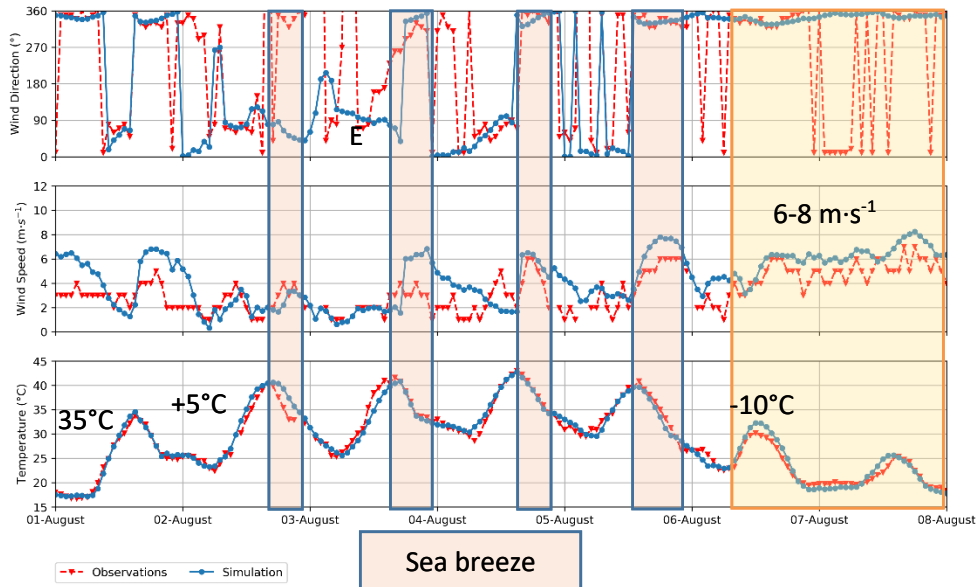

**Figure S6.** Comparison of observed (red) and simulated (blue) wind direction, wind speed, and temperature time series for the Lisbon station (August 1-7, 2018). The phases of sea breezes are marked in blue squares and the passage of the front with its consequent reduction of temperatures and wind intensity increase in orange.

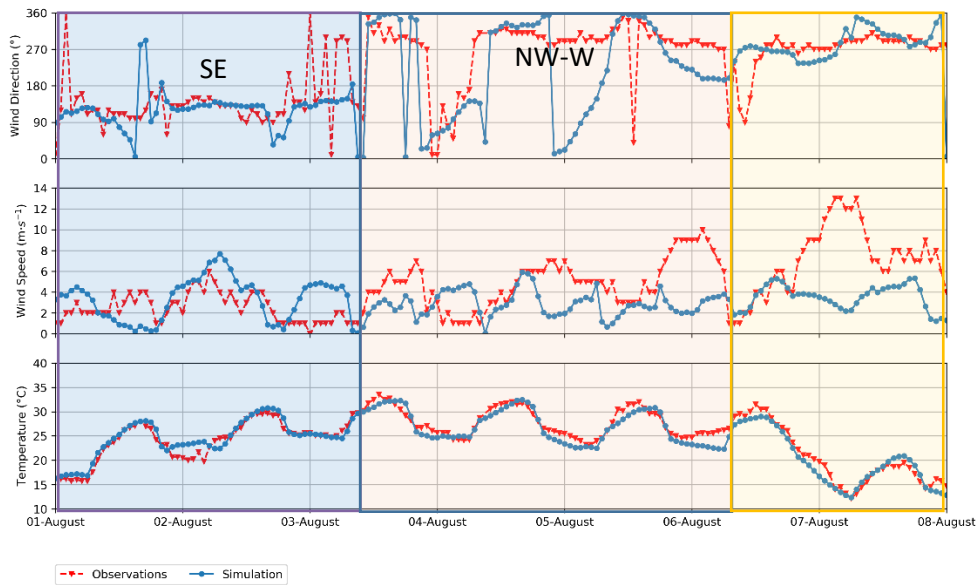

**Figure S7.** Comparison of observed (red) and simulated (blue) wind direction, wind speed and temperature time series for the Penhas Douradas station (1398 m ASL) (August 1-7, 2018). The three meteorological changes observed during the episode are distinguished by color.

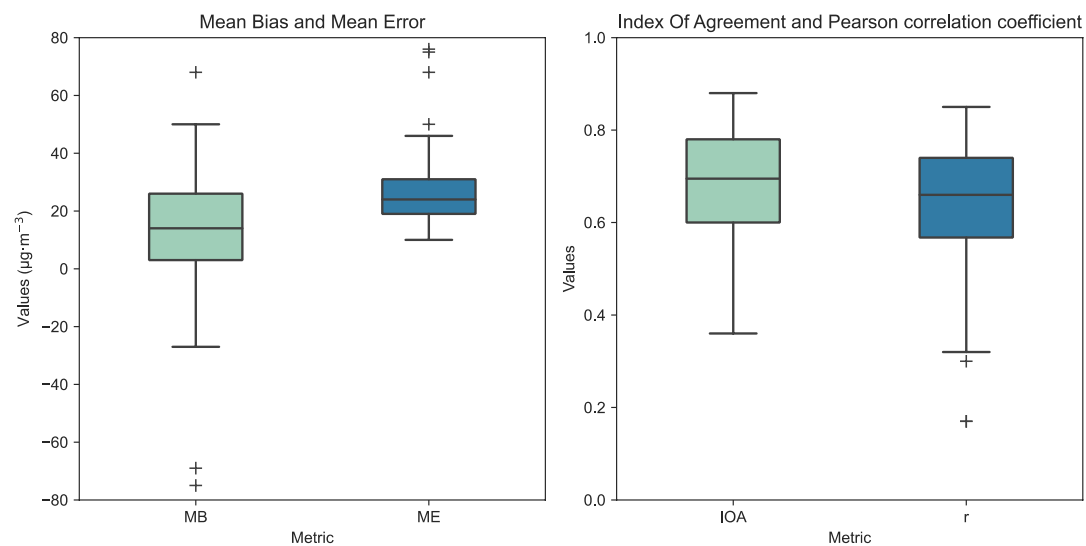

**Figure S8.** Box and whisker plots for the statistical metrics (MB, ME, IOA, and r) calculated for the 116 O3 measurement stations. The boxes span from the first to the third quartile and the line inside the boxes represents the median. Whiskers extend to the most extreme data points within 1.5 times the interquartile range. Any metrics beyond this range are considered outliers and are plotted as individual points (+).

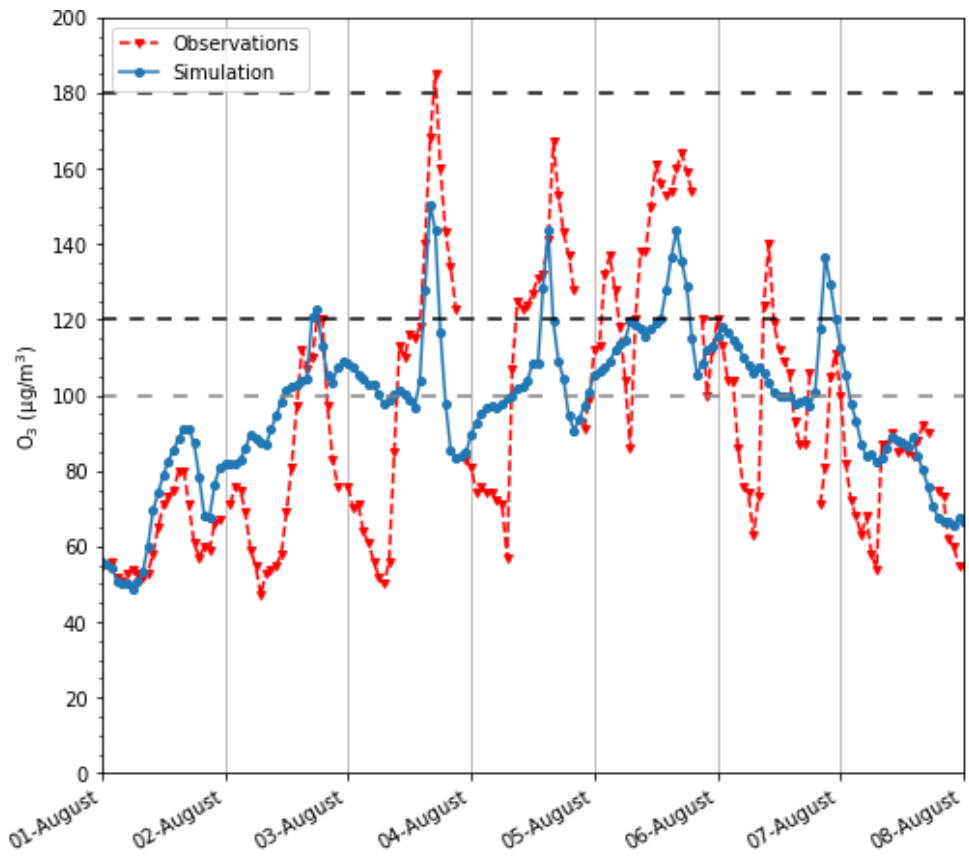

Figure S9. Comparison of the observed (red) and simulated (blue) hourly O<sub>3</sub> time series for the Valderejo Natural Park (VNP) station.

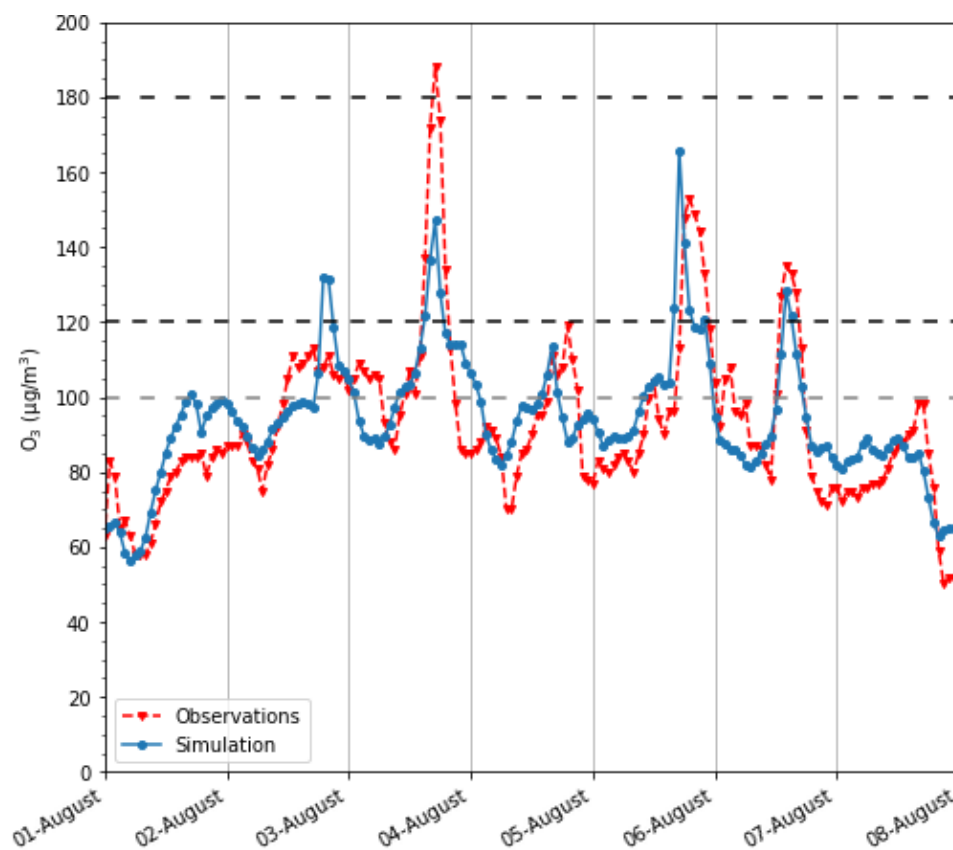

Figure S10. Comparison of the observed (red) and simulated (blue) hourly O<sub>3</sub> time series for the Douro Norte (DN) station.

## References

Alapaty, K., Niyogi, D., Chen, F., Pyle, P., Chandrasekar, A., and Seaman, N.: Development of the Flux-Adjusting Surface Data Assimilation System for Mesoscale Models, *Journal of Applied Meteorology and Climatology*, 47(9), 2331-2350, <https://doi.org/10.1175/2008JAMC1831.1>, 2008.

Dudhia, J.: Numerical Study of Convection Observed during the Winter Monsoon Experiment Using a Mesoscale Two-Dimensional Model, *Journal of the Atmospheric Sciences*, 46(20), 3077-3107, [https://doi.org/10.1175/1520-0469\(1989\)046<3077:NSOCOD>2.0.CO;2](https://doi.org/10.1175/1520-0469(1989)046<3077:NSOCOD>2.0.CO;2), 1989.

Hong, S. and Lim, J.: The WRF Single-Moment 6-Class Microphysics Scheme (WSM6), *Journal of the Korean Meteorological Society*, 42, 129-151, 2006.

Hong, S.-Y., Noh, Y., and Dudhia, J.: A New Vertical Diffusion Package with an Explicit Treatment of Entrainment Processes, *Monthly Weather Review*, 134, 2318-2341, <http://dx.doi.org/10.1175/MWR3199.1>, 2006.

Knapp, K. R.: Scientific data stewardship of International Satellite Cloud Climatology Project B1 global geostationary observations, *Journal of Applied Remote Sensing*, 2, 023548, <http://doi:10.1117/1.3043461>, 2008.

Mlawer, E. J., Taubman, S. J., Brown, P. D., Iacono, M. J., and Clough, S. A.: Radiative transfer for inhomogeneous atmospheres: RRTM, a validated correlated-k model for the longwave, *Journal of Geophysical Research: Atmospheres*, 102(D14), 16663-16682, <https://doi.org/10.1029/97JD00237>, 1997.

Reynolds, R. W., Smith, T. M., Liu, C., Chelton, D. B., Casey, K. S., and Schlax., M. G.: Daily high-resolution-blended analyses for sea surface temperature, *Journal of Climate*, 20, 5473-5496, <http://doi:10.1175/JCLI-D-14-00293.1>, 2007.
